# Supplementary material
Source: PubMed Central journal article supplement (PMC5258848)
Supplement: NIHMS828154-supplement-Supplemental_Info.pdf [file NIHMS828154-supplement-Supplemental_Info.pdf]

*Legends to supplementary figures:*

Figure S1. Nicotinamide riboside promotes liver regeneration.

(A) Immunohistochemistry for Ki-67 at 48h post PHx.

(B) Transcripts from cell cycle related genes (cyclins, cyclin dependent kinases and cyclin dependent kinase inhibitors) were analyzed at 24h post PHx.

(C) *Left:* Weights of the resected liver portions from vehicle (H<sub>2</sub>O) or NR treated animals, normalized to body weights. *Right:* Weights of resected liver portions from control or Nampt overexpressing mice, normalized to body weight.

(D) Percent of weight loss post PHx.

(E) *Left:* Liver NADH content pre and post PHx. *Right:* NAD/NADH ratio pre and post PHx

(F) *Left:* Blood glucose measured in random fed mice pre and post PHx. *Right:* Plasma FFA content pre and post PHx in NR and H<sub>2</sub>O treated mice.

Error bars represent S.E.M. #,  $p < 0.1$ ; \*,  $p < 0.05$ ; \*\*,  $p < 0.01$ ; \*\*\*,  $p < 0.001$ .

Figure S2. Nampt overexpression induces Atgl and Perlipin 2. mRNA expression levels for genes regulating lipid metabolism were determined in livers of wild type (N) or liver-specific Nampt overexpressing (NALbCre) mice pre or 24 hours post PHx.

Error bars represent S.E.M. \*,  $p < 0.05$ ; \*\*,  $p < 0.01$ .

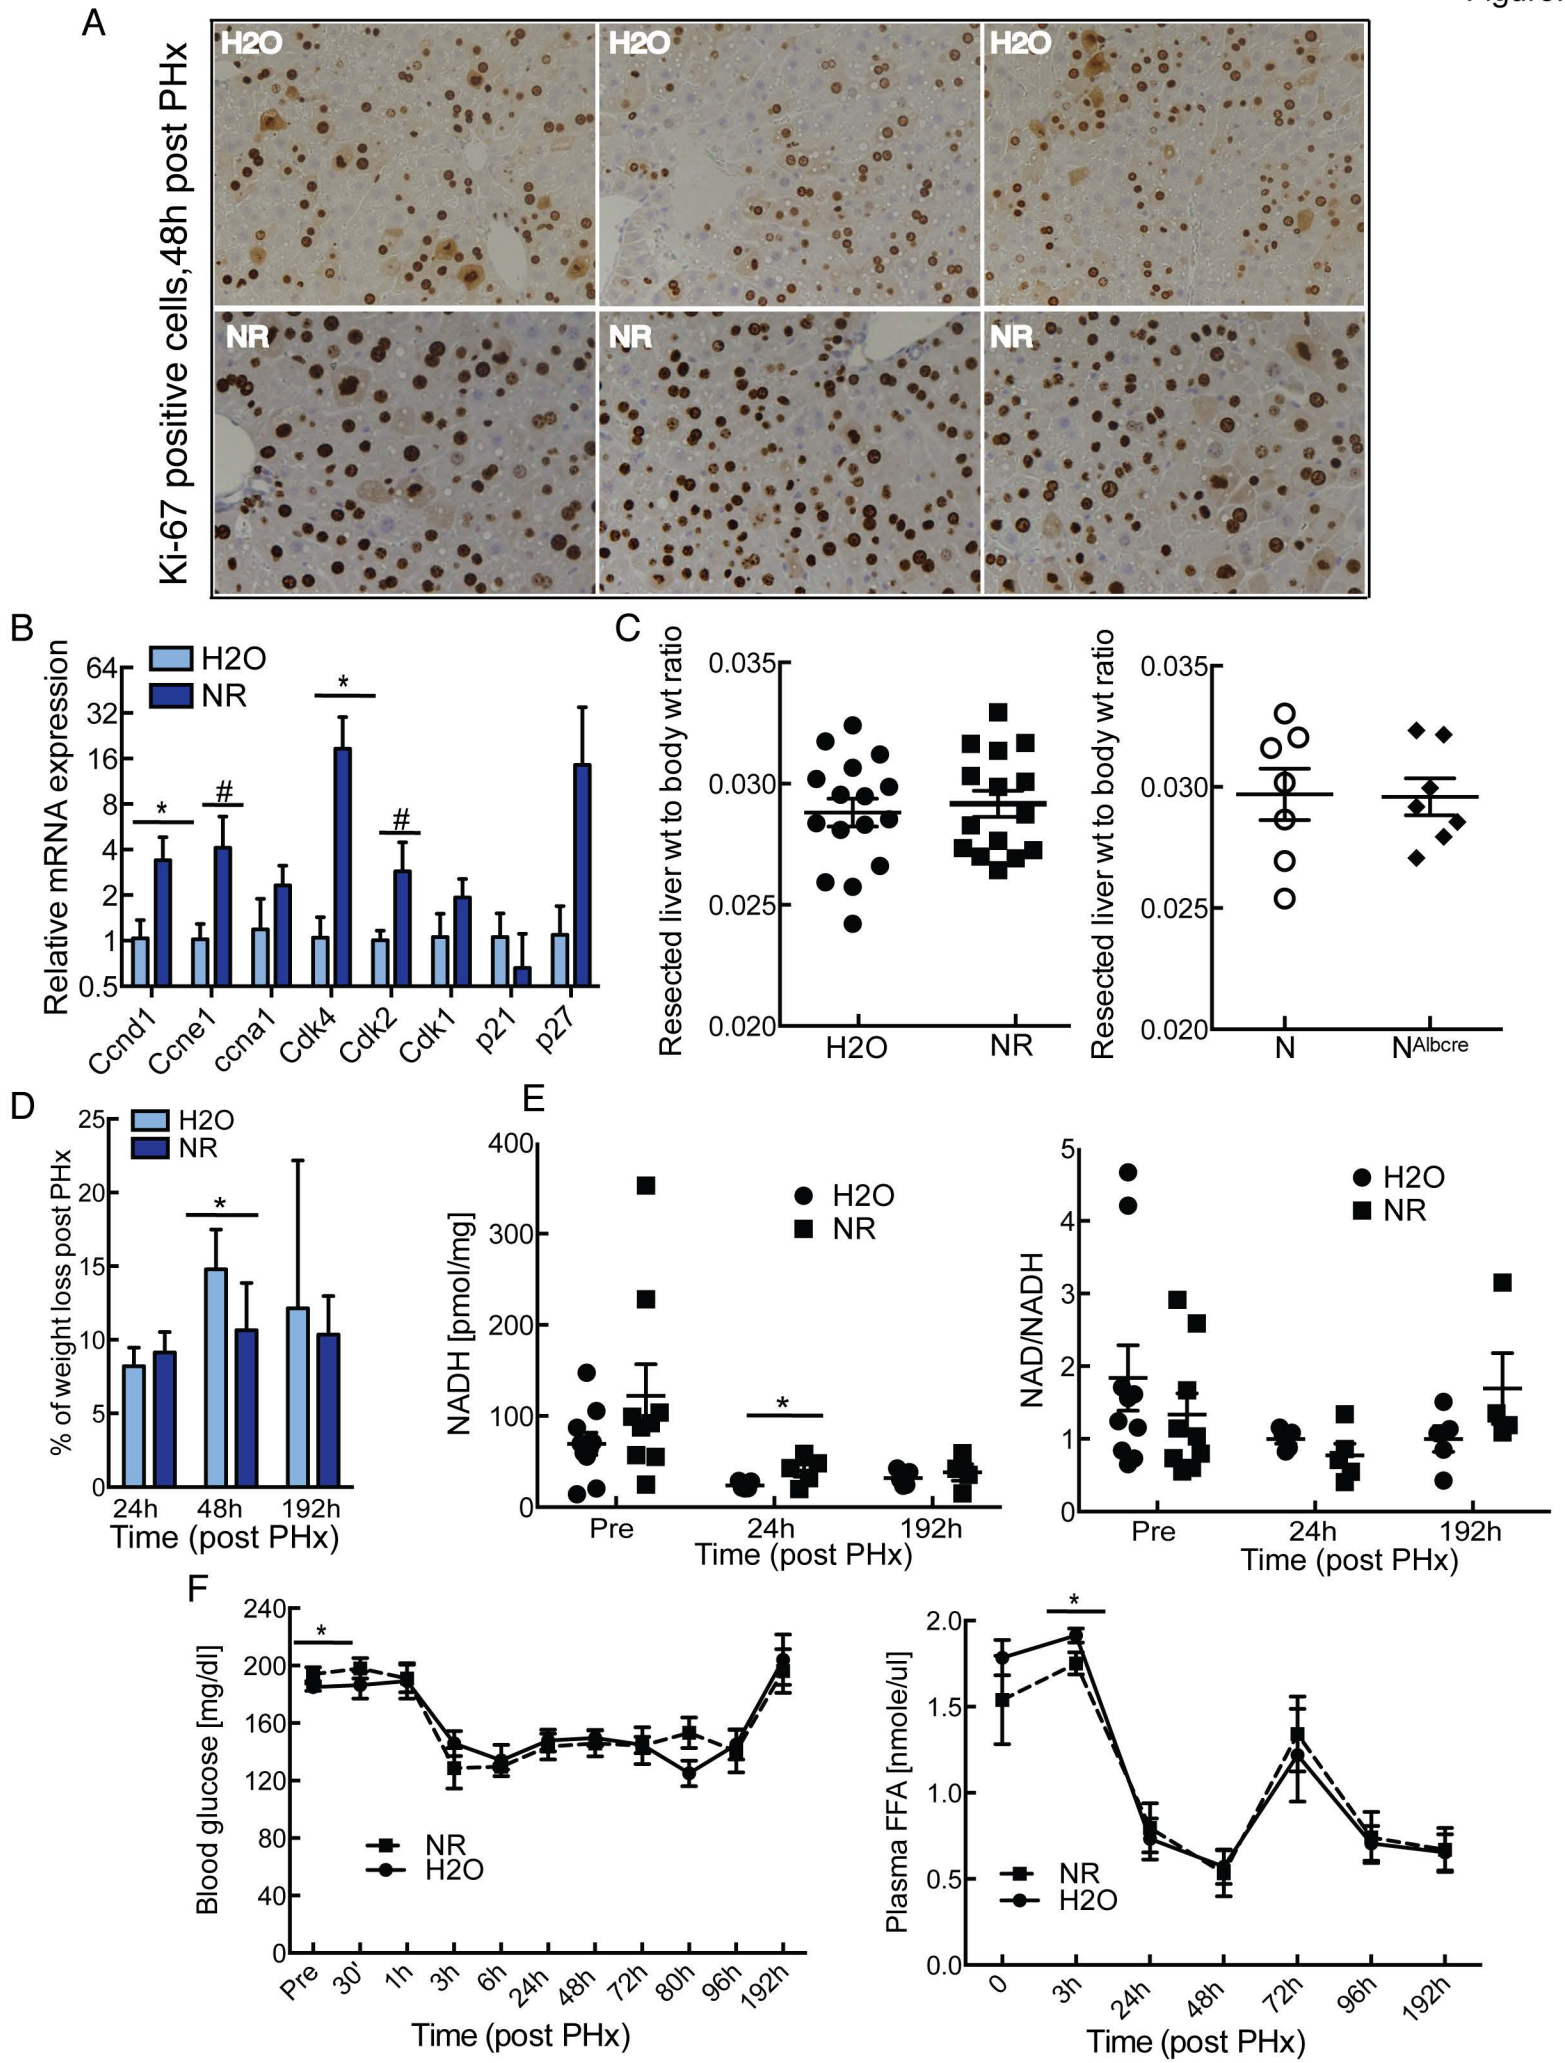

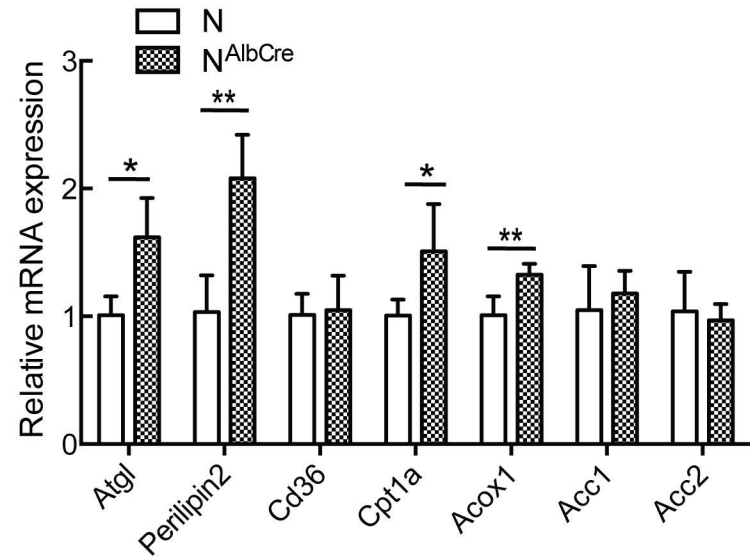

Supporting Table S1. Primer list for RT-qPCR.

| Gene              | Forward primer          | Reverse primer           |
|-------------------|-------------------------|--------------------------|
| <i>b-actin</i>    | GGCTGTATTCCCCTCCATCG    | CCAGTTGGTAACAATGCCATGT   |
| <i>Atgl</i>       | GACGGAGAGAACGTCATCATATC | CCACAGTACACCGGGATAAAT    |
| <i>Perilipin2</i> | GTGGAAAGGACCAAGTCTGTG   | GACTCCAGCCTGTCATAGTTG    |
| <i>Hsl</i>        | CCAGCCTGAGGGCTTACTG     | CTCCATTGACTGTGACATCTCG   |
| <i>Pdk4</i>       | TCCTTCCTTCCTTCCTTCTTCC  | TGGGAGTCAAAGTCTCTGCTGT   |
| <i>Dgat1</i>      | TGGTGTGTGGTGATGCTGATC   | GCCAGGCGCTTCTCAA         |
| <i>Cd36</i>       | GAACCACTGCTTTCAAAAAGTGG | TGCTGTTCTTTGCCACGTCA     |
| <i>Lcad</i>       | TCTTTTCTCGGAGCATGACA    | GACCTCTCTACTCACTTCTCCAG  |
| <i>Mcad</i>       | AGTACCCGTTCCCTCTCATCA   | CCATACGCCAACTCTTCGGTAA   |
| <i>Cpt1a</i>      | GCAGAGGCTCACCAAGCTGTG   | CTTCGTCTGGCTTGACATGCG    |
| <i>Acox1</i>      | CAGACCCTGAAGAAATCATGTGG | CAGGAACATGCCCAAGTGAAG    |
| <i>Fasn</i>       | GCTGCGGAAACTTCAGGAAAT   | AGAGACGTGTCACTCCTGGACTT  |
| <i>Srebp1c</i>    | GGAGCCATGGATTGCACATT    | GGCCCGGGAAGTCACTGT       |
| <i>Acc1</i>       | GACAGACTGATCGCAGAGAAAG  | TGGAGAGCCCCACACACA       |
| <i>Acc2</i>       | CGCTCACCAACAGTAAGGTGG   | GCTTGGCAGGGAGTTCCTC      |
| <i>Clpp</i>       | TGTTGCGGGAACGCATCGTGT   | AGATGGCCAGGCCCGCAGTT     |
| <i>Hspe1</i>      | CTGACAGGTTCAATCTCTCCAC  | AGGTGGCATTATGCTTCCAG     |
| <i>Hspd1</i>      | GCTGTAGCTGTTACAATGGGG   | TGACTTTGCAACAGTGACCC     |
| <i>Atf4</i>       | TGAAGGAGTTCGACTTGGATGCC | CAGAAGGTCATCTGGCATGGTTTC |
| <i>Chop</i>       | CCACCACACCTGAAAGCAGAA   | AGGTGAAAGGCAGGGACTCA     |
| <i>Grp78</i>      | GTGGAGATCATAGCCAACGA    | GCTGGTACAGTAACAACCTGC    |
| <i>Xbp1s</i>      | AAGAACACGCTTGGGAATGG    | CTGCACCTGCTGCGGAC        |
| <i>Xbp1m</i>      | AGCAGCAAGTGGTGGATTTG    | GAGTTTTCTCCGTAAAAGCTGA   |
| <i>Atp5a1</i>     | CATTGGTGATGGTATTGCGC    | TCCCAAACACGACAACCTCC     |
| <i>Cox5b</i>      | ACCCTAATCTAGTCCCCTCC    | CAGCCAAAACCAGATGACAG     |
| <i>Cytc</i>       | GGAGGCAAGCATAAGACTGG    | TCCATCAGGGTATCCTCTCC     |
| <i>Sdhb</i>       | ACCCCTTCTCTGTCTACCG     | AATGCTCGCTTCTCCTTGTAG    |
| <i>Nampt</i>      | AGCAGCAGAGCACAGTACCA    | GCTATCGCTGACCACAGACA     |
| <i>Ccna1</i>      | GCCTTCACCATTCTATGTGGAT  | TTGCTGCGGGTAAAGAGACAG    |
| <i>Ccnd1</i>      | GCGTACCCTGACACCAATCTC   | CTCCTCTTCGCACTTCTGCTC    |
| <i>Ccne1</i>      | GTGGCTCCGACCTTTCAGTC    | CAGTCTTGCAATCTTGGA       |
| <i>Cdk1</i>       | ACACCTTCAAATCCAAGCCTTC  | TGTCAGCAAGACAAACCCAAGT   |
| <i>Cdk2</i>       | AGGTTTTGCCATCCCAATCTTA  | CCCAACTTAGGCTTCTGCTCAT   |
| <i>Cdk4</i>       | CCAATGTTGTACGGCTGATGG   | GCTTGACGGTCCCATTACTTG    |
| <i>p21</i>        | CCTGGTGATGTCCGACCTG     | CCATGAGCGCATCGCAATC      |
| <i>p27</i>        | GCAGATACGAGTGGCAGGAG    | GAATCTTCTGCAGCAGGTCTG    |
